# Supplementary material for: A heuristic derived from analysis of the ion channel structural proteome permits the rapid identification of hydrophobic gates
Source: PubMed Central journal article supplement (PMC6628796; doi:10.1073/pnas.1902702116), 2019-06-24
Supplement: pnas.1902702116.sapp.pdf [file pnas.1902702116.sapp.pdf]

**Table S1. Ion channel structures analysed.** Any auxiliary subunits, Fab fragments, ligands, ions, and/or water molecules present in a PDB entry were removed prior to molecular dynamics simulations. Large structures that were truncated to include only the transmembrane or pore domain for analysis are indicated by an asterisk (\*) next to their PDB ID. Where available, the likely functional state of a channel structure as suggested upon its publication is noted. The height of the main energetic barrier to water ( $G_{\text{water}}$ ) is recorded for each structure, with values coloured red ( $> 1$  RT) or blue ( $\leq 1$  RT).

| Protein                               | PDB   | Method  | Resolution (Å) | Proposed functional state     | $G_{\text{water}}$ (kJ mol <sup>-1</sup> ) |
|---------------------------------------|-------|---------|----------------|-------------------------------|--------------------------------------------|
| <b>Cys-loop receptors</b>             |       |         |                |                               |                                            |
| 5HT3R, <i>M. musculus</i>             | 4PIR  | X-ray   | 3.5            |                               | 42                                         |
| 5HT3R, <i>M. musculus</i>             | 6BE1  | cryo-EM | 4.31           | closed                        | 44                                         |
| ELIC, <i>E. chrysanthemi</i>          | 2VL0  | X-ray   | 3.3            | closed                        | 90                                         |
| ELIC, <i>E. chrysanthemi</i>          | 3RQW  | X-ray   | 2.91           | closed                        | 79                                         |
| GABAAR, <i>H. sapiens</i>             | 4COF  | X-ray   | 2.97           | desensitised                  | 1                                          |
| GABAAR, <i>H. sapiens</i>             | 6A96  | cryo-EM | 3.51           | open                          | 0                                          |
| GABAAR, <i>H. sapiens</i>             | 6D6T  | cryo-EM | 3.86           | desensitised                  | 2                                          |
| GABAAR, <i>H. sapiens</i>             | 6D6U  | cryo-EM | 3.92           | desensitised                  | 28                                         |
| GLIC, <i>G. violaceus</i>             | 2XQ7  | X-ray   | 3.4            | open                          | 1                                          |
| GLIC, <i>G. violaceus</i>             | 3EHZ  | X-ray   | 3.1            | open                          | 0                                          |
| GLIC, <i>G. violaceus</i>             | 4F8H  | X-ray   | 2.99           |                               | 0                                          |
| GLIC, <i>G. violaceus</i>             | 4HFI  | X-ray   | 2.4            | open                          | 0                                          |
| GLIC, <i>G. violaceus</i>             | 4NPP  | X-ray   | 3.35           | open                          | 1                                          |
| GLIC, <i>G. violaceus</i>             | 4QH5  | X-ray   | 3              | open                          | 0                                          |
| GLIC, <i>G. violaceus</i>             | 5J0Z  | X-ray   | 3.25           | desensitised                  | 1                                          |
| GLIC, <i>G. violaceus</i>             | 5L47  | X-ray   | 3.3            | closed                        | 48                                         |
| GluCl, <i>C. elegans</i>              | 3RHW  | X-ray   | 3.26           | open                          | 1                                          |
| GluCl, <i>C. elegans</i>              | 3RIF  | X-ray   | 3.35           | open                          | 1                                          |
| GluCl, <i>C. elegans</i>              | 4TNV  | X-ray   | 3.6            | closed                        | 12                                         |
| GlyR, <i>D. rerio</i>                 | 3JAD  | cryo-EM | 3.9            | closed                        | 4.6                                        |
| GlyR, <i>D. rerio</i>                 | 3JAE  | cryo-EM | 3.9            | open                          | 0                                          |
| GlyR, <i>D. rerio</i>                 | 3JAF  | cryo-EM | 3.8            | desensitised/<br>intermediate | 1                                          |
| GlyR, <i>H. sapiens</i>               | 5CFB  | X-ray   | 3.04           | closed                        | 23                                         |
| GlyR, <i>H. sapiens</i>               | 5VDH  | X-ray   | 2.85           | desensitised/<br>intermediate | 24                                         |
| nAChR, <i>T. marmorata</i>            | 1OED  | EM      | 4              | closed                        | 10                                         |
| nAChR, <i>T. marmorata</i>            | 2BG9  | EM      | 4              | closed                        | 3.6                                        |
| nAChR, <i>H. sapiens</i>              | 5KXI  | X-ray   | 3.94           | desensitised                  | 0                                          |
| <b>Ionotropic glutamate receptors</b> |       |         |                |                               |                                            |
| GluA, <i>R. norvegicus</i>            | 5WEK* | cryo-EM | 4.6            | closed                        | 4                                          |
| GluA, <i>R. norvegicus</i>            | 5WEL* | cryo-EM | 4.4            | closed                        | 7                                          |
| GluA, <i>R. norvegicus</i>            | 5WEO* | cryo-EM | 4.2            | open                          | 1                                          |
| GluN, <i>X. laevis</i>                | 5UOW* | cryo-EM | 4.5            | open                          | 1                                          |
| <b>Purinergic receptors</b>           |       |         |                |                               |                                            |
| P2X3, <i>H. sapiens</i>               | 5SVJ  | X-ray   | 2.98           | closed                        | 26                                         |
| P2X3, <i>H. sapiens</i>               | 5SVK  | X-ray   | 2.77           | open                          | 0                                          |
| P2X3, <i>H. sapiens</i>               | 5SVL  | X-ray   | 2.9            | desensitised                  | 23                                         |
| P2X4, <i>D. rerio</i>                 | 3H9V  | X-ray   | 3.1            | closed                        | 39                                         |
| P2X4, <i>D. rerio</i>                 | 3I5D  | X-ray   | 3.46           | closed                        | 43                                         |

|                                                    |       |         |      |              |     |
|----------------------------------------------------|-------|---------|------|--------------|-----|
| P2X4, <i>D. rerio</i>                              | 4DW0  | X-ray   | 2.9  | closed       | 36  |
| P2X4, <i>D. rerio</i>                              | 4DW1  | X-ray   | 2.8  | open         | 0   |
| P2X7, <i>G. gallus</i>                             | 5XW6  | X-ray   | 3.1  | closed       | 56  |
| <b>Transient receptor potential (TRP) channels</b> |       |         |      |              |     |
| NOMPC,<br><i>D. melanogaster</i>                   | 5VKQ* | cryo-EM | 3.55 | closed       | 11  |
| PKD2, <i>H. sapiens</i>                            | 5K47  | cryo-EM | 4.22 | closed       | 10  |
| PKD2, <i>H. sapiens</i>                            | 5MKE  | cryo-EM | 4.3  | open         | 1   |
| PKD2, <i>H. sapiens</i>                            | 5MKF  | cryo-EM | 4.2  | closed       | 13  |
| PKD2, <i>H. sapiens</i>                            | 5T4D  | cryo-EM | 3    | closed       | 32  |
| PKD2, <i>H. sapiens</i>                            | 6D1W  | cryo-EM | 3.54 | open         | 15  |
| PKD2L1, <i>M. musculus</i>                         | 5Z1W  | cryo-EM | 3.38 | open         | 29  |
| TRPA1, <i>H. sapiens</i>                           | 3J9P  | cryo-EM | 4.24 | closed       | 76  |
| TRPM2, <i>N. vectensis</i>                         | 6CO7  | cryo-EM | 3.07 | closed       | 44  |
| TRMP4, <i>M. musculus</i>                          | 6BCL  | cryo-EM | 3.54 | closed       | 9   |
| TRMP4, <i>M. musculus</i>                          | 6BCQ  | cryo-EM | 3.25 | closed       | 10  |
| TRMP4, <i>H. sapiens</i>                           | 6BQR  | cryo-EM | 3.2  | closed       | 8   |
| TRPML1, <i>H. sapiens</i>                          | 5WJ5  | cryo-EM | 3.72 | closed       | 27  |
| TRPML1, <i>H. sapiens</i>                          | 5WJ9  | cryo-EM | 3.49 | open         | 1   |
| TRPML1, <i>M. musculus</i>                         | 5WPV  | cryo-EM | 3.59 | closed       | 9   |
| TRPML3, <i>C. jacchus</i>                          | 5W3S  | cryo-EM | 2.94 | closed       | 7   |
| TRPML3, <i>H. sapiens</i>                          | 6AYE  | cryo-EM | 4.06 | closed       | 16  |
| TRPML3, <i>H. sapiens</i>                          | 6AYF  | cryo-EM | 3.62 | open         | 0   |
| TRPML3, <i>H. sapiens</i>                          | 6AYG  | cryo-EM | 4.65 | closed       | 10  |
| TRPV1, <i>R. norvegicus</i>                        | 3J5P  | cryo-EM | 3.28 | closed       | 9   |
| TRPV1, <i>R. norvegicus</i>                        | 3J5Q  | cryo-EM | 3.8  | open         | 4.9 |
| TRPV1, <i>R. norvegicus</i>                        | 3J5R  | cryo-EM | 4.2  | closed       | 5.2 |
| TRPV1, <i>R. norvegicus</i>                        | 5IRX  | cryo-EM | 2.95 | open         | 1   |
| TRPV1, <i>R. norvegicus</i>                        | 5IRZ  | cryo-EM | 3.28 | closed       | 8   |
| TRPV1, <i>R. norvegicus</i>                        | 5IS0  | cryo-EM | 3.43 | closed       | 9   |
| TRPV2, <i>O. cuniculus</i>                         | 5AN8  | cryo-EM | 3.8  | desensitised | 67  |
| TRPV2, <i>O. cuniculus</i>                         | 6BWJ  | X-ray   | 3.1  | closed       | 73  |
| TRPV2, <i>R. norvegicus</i>                        | 5HI9  | cryo-EM | 4.4  | open         | 38  |
| TRPV4, <i>X. tropicalis</i>                        | 6BBJ  | cryo-EM | 3.8  | closed       | 40  |
| TRPV5, <i>O. cuniculus</i>                         | 6B5V  | cryo-EM | 4.8  | closed       | 21  |
| TRPV6, <i>R. norvegicus</i>                        | 5IWK  | X-ray   | 3.25 | closed       | 32  |
| TRPV6, <i>R. norvegicus</i>                        | 5IWP  | X-ray   | 3.65 | closed       | 21  |
| TRPV6, <i>R. norvegicus</i>                        | 5WO6  | X-ray   | 3.31 |              | 20  |
| TRPV6, <i>H. sapiens</i>                           | 6BO8  | cryo-EM | 3.6  | open         | 1   |
| TRPV6, <i>H. sapiens</i>                           | 6BOB  | cryo-EM | 3.9  | closed       | 37  |
| <b>2TM family K<sup>+</sup> channels</b>           |       |         |      |              |     |
| GsuK, <i>G. sulfurreducens</i>                     | 4GX5  | X-ray   | 3.7  | closed       | 12  |
| K2P1.1, <i>H. sapiens</i>                          | 3UKM  | X-ray   | 3.4  | open         | 0   |
| K2P2.1, <i>M. musculus</i>                         | 5VKP  | X-ray   | 2.8  |              | 0   |
| K2P4.1, <i>H. sapiens</i>                          | 4WFE  | X-ray   | 2.5  | open         | 0   |
| K2P10.1, <i>H. sapiens</i>                         | 4BW5  | X-ray   | 3.2  | open         | 1   |
| K2P10.1, <i>H. sapiens</i>                         | 4XDL  | X-ray   | 3.5  | open         | 1   |
| KcsA, <i>S. lividans</i>                           | 1K4C  | X-ray   | 2    |              | 34  |
| KcsA, <i>S. lividans</i>                           | 2ITD  | X-ray   | 2.7  |              | 44  |
| KcsA, <i>S. lividans</i>                           | 3EFF  | X-ray   | 3.8  | closed       | 49  |

|                                                                          |       |         |      |                |     |
|--------------------------------------------------------------------------|-------|---------|------|----------------|-----|
| KcsA, <i>S. lividans</i>                                                 | 3FB5  | X-ray   | 2.8  | partially open | 0   |
| KcsA, <i>S. lividans</i>                                                 | 3PJS  | X-ray   | 3.8  | open           | 0   |
| KcsA, <i>S. lividans</i>                                                 | 4UUJ  | X-ray   | 2.4  | closed         | 24  |
| Kir2.2, <i>G. gallus</i>                                                 | 3JYC  | X-ray   | 3.11 | closed         | 20  |
| Kir2.2, <i>G. gallus</i>                                                 | 3SPC  | X-ray   | 2.45 | closed         | 28  |
| Kir2.2, <i>G. gallus</i>                                                 | 3SPI  | X-ray   | 3.31 | closed         | 37  |
| Kir3.2, <i>M. musculus</i>                                               | 3SYA  | X-ray   | 2.98 | closed         | 3.1 |
| Kir3.2, <i>M. musculus</i>                                               | 3SYO  | X-ray   | 3.54 | closed         | 0   |
| Kir6.2, <i>R. norvegicus</i>                                             | 6BAA  | cryo-EM | 3.63 | closed         | 29  |
| Kir6.2, <i>H. sapiens</i>                                                | 6C3O  | cryo-EM | 3.9  |                | 37  |
| KirBac1.1,<br><i>B. pseudomallei</i>                                     | 2WLL  | X-ray   | 3.65 | closed         | 14  |
| KirBac1.3/Kir3.1, <i>M. musculus/B. xenovornas</i>                       | 2QKS  | X-ray   | 2.2  | closed         | 27  |
| KirBac3.1,<br><i>M. magnetotacticum</i>                                  | 2WLH  | X-ray   | 3.28 | closed         | 45  |
| KirBac3.1,<br><i>M. magnetotacticum</i>                                  | 2WLI  | X-ray   | 3.09 | closed         | 10  |
| KirBac3.1,<br><i>M. magnetotacticum</i>                                  | 2WLJ  | X-ray   | 2.6  | closed         | 7   |
| MthK,<br><i>M. thermotrophicus</i>                                       | 1LNQ  | X-ray   | 3.3  | open           | 0   |
| NaK, <i>B. cereus</i>                                                    | 2AHY  | X-ray   | 2.4  | closed         | 20  |
| NaK, <i>B. cereus</i>                                                    | 3E86  | X-ray   | 1.6  | open           | 0   |
| NaK/NavSulP,<br><i>B. mycooides/S. pontiacus</i>                         | 3VOU  | X-ray   | 3.2  | closed         | 59  |
| <b>4TM or 6TM K<sup>+</sup> channels</b>                                 |       |         |      |                |     |
| KCNQ1, <i>X. laevis</i>                                                  | 5VMS  | cryo-EM | 3.7  | closed         | 89  |
| Kv1.2, <i>R. norvegicus</i>                                              | 2A79  | X-ray   | 2.9  | open           | 0   |
| Kv1.2, <i>R. norvegicus</i>                                              | 2R9R  | X-ray   | 2.4  | open           | 0   |
| Kv1.2, <i>R. norvegicus</i>                                              | 3LUT  | X-ray   | 2.9  | open           | 0   |
| Kv10.1, <i>R. norvegicus</i>                                             | 5K7L* | cryo-EM | 3.78 | closed         | 17  |
| Kv11.1, <i>H. sapiens</i>                                                | 5VA1* | cryo-EM | 3.7  | open           | 0   |
| KvAp, <i>A. pernix</i>                                                   | 1ORQ  | X-ray   | 3.2  | open           | 0   |
| KvLm,<br><i>L. monocytogenes</i>                                         | 4H33  | X-ray   | 3.1  | closed         | 14  |
| KvLm,<br><i>L. monocytogenes</i>                                         | 4H37  | X-ray   | 3.35 | closed         | 11  |
| MloK1, <i>M. loti</i>                                                    | 3BEH  | X-ray   | 3.1  | closed         | 22  |
| MloK1, <i>M. loti</i>                                                    | 6EO1  | cryo-EM | 4.5  | open           | 0   |
| Slo1, <i>A. californica</i>                                              | 5TJ6  | cryo-EM | 3.5  | open           | 0   |
| Slo1, <i>A. californica</i>                                              | 5TJI  | cryo-EM | 3.8  |                | 0   |
| Slo2.2, <i>G. gallus</i>                                                 | 5U70  | cryo-EM | 3.76 | open           | 0   |
| Slo2.2, <i>G. gallus</i>                                                 | 5U76  | cryo-EM | 3.76 | closed         | 0   |
| <b>Other members of the voltage-gated ion channel (VGIC) superfamily</b> |       |         |      |                |     |
| Cav1.1, <i>O. cuniculus</i>                                              | 5GJV  | cryo-EM | 3.6  | closed         | 80  |
| CavAb, <i>A. butzleri</i>                                                | 4MVM  | X-ray   | 3.20 |                | 7   |
| CavAb, <i>A. butzleri</i>                                                | 5KLB  | X-ray   | 2.7  |                | 27  |
| TAX5 (CNG),<br><i>C. elegans</i>                                         | 5H3O  | cryo-EM | 3.5  | open           | 1   |
| LliK (CNG),                                                              | 5V4S  | cryo-EM | 4.2  | closed         | 33  |

|                               |       |         |       |                      |     |
|-------------------------------|-------|---------|-------|----------------------|-----|
| <i>L. licerasiae</i>          |       |         |       |                      |     |
| HcN1, <i>H. sapiens</i>       | 5U6O  | cryo-EM | 3.5   | closed               | 28  |
| Hv1, <i>M. musculus</i>       | 3WKV  | X-ray   | 3.45  | closed               | 32  |
| InsP3R1, <i>R. norvegicus</i> | 3JAV* | cryo-EM | 4.7   | closed               | 47  |
| Nav1.4, <i>E. electricus</i>  | 5XSX  | cryo-EM | 4     | open                 | 28  |
| NavAb, <i>A. butzleri</i>     | 4EKW  | X-ray   | 3.21  | closed               | 19  |
| NavAb, <i>A. butzleri</i>     | 4MW8  | X-ray   | 3.26  |                      | 2.5 |
| NavAb, <i>A. butzleri</i>     | 5EK0  | X-ray   | 3.53  | closed               | 90  |
| NavAb, <i>A. butzleri</i>     | 5VB2  | X-ray   | 3.2   | closed               | 119 |
| NavAb, <i>A. butzleri</i>     | 5VB8  | X-ray   | 2.85  | open                 | 6   |
| NavAe1, <i>A. ehrlichii</i>   | 4LTO  | X-ray   | 3.46  | closed               | 85  |
| NavMm, <i>M. marinus</i>      | 4CBC  | X-ray   | 2.66  | open                 | 25  |
| NavMm, <i>M. marinus</i>      | 4OXS  | X-ray   | 2.8   | open                 | 28  |
| NavPaS, <i>P. americana</i>   | 5X0M  | cryo-EM | 3.8   | closed               | 41  |
| NavRh, <i>R. HIMB114</i>      | 4DXW  | X-ray   | 3.05  | closed               | 58  |
| RyR1, <i>O. cuniculus</i>     | 3J8H* | cryo-EM | 3.8   | closed               | 11  |
| RyR1, <i>O. cuniculus</i>     | 5TB0* | cryo-EM | 4.4   | closed               | 8   |
| RyR2, <i>S. scrofa</i>        | 5GO9* | cryo-EM | 4.4   | closed               | 12  |
| RyR2, <i>S. scrofa</i>        | 5GOA* | cryo-EM | 4.2   | open                 | 0   |
| TPC1, <i>A. thaliana</i>      | 5DQQ  | X-ray   | 2.87  | closed               | 39  |
| TPC1, <i>M. musculus</i>      | 6C9A  | cryo-EM | 3.2   | open                 | 2   |
| TPC1, <i>M. musculus</i>      | 6C96  | cryo-EM | 3.4   | closed               | 56  |
| <b>Other cation channels</b>  |       |         |       |                      |     |
| ASIC1, <i>G. gallus</i>       | 2QTS  | X-ray   | 1.9   | desensitised (-like) | 23  |
| ASIC1, <i>G. gallus</i>       | 3S3W  | X-ray   | 2.6   | desensitised (-like) | 21  |
| ASIC1, <i>G. gallus</i>       | 4NTW  | X-ray   | 2.07  | open                 | 1   |
| ASIC1, <i>G. gallus</i>       | 4NTY  | X-ray   | 2.65  | open                 | 0   |
| ASIC1, <i>G. gallus</i>       | 4NYK  | X-ray   | 3     | desensitised         | 17  |
| ASIC1, <i>G. gallus</i>       | 5WKU  | X-ray   | 2.95  | closed               | 38  |
| ExbB/ExbD, <i>E. coli</i>     | 5SV0  | X-ray   | 2.6   |                      | 0   |
| ExbB/ExbD, <i>E. coli</i>     | 5SV1  | X-ray   | 3.5   |                      | 0   |
| M2, <i>Influenza A</i>        | 3BKD  | X-ray   | 2.05  | closed               | 4.6 |
| M2, <i>Influenza A</i>        | 4QKC  | X-ray   | 1.1   |                      | 6   |
| M2, <i>Influenza A</i>        | 5JOO  | X-ray   | 1.41  |                      | 5.9 |
| M2, <i>Influenza A</i>        | 5TTC  | X-ray   | 1.4   |                      | 5.9 |
| M2, <i>Influenza A</i>        | 5UM1  | X-ray   | 1.45  |                      | 6   |
| M2, <i>Influenza B</i>        | 2KIX  | aq NMR  | (NMR) | closed               | 5.4 |
| MCU, <i>C. elegans</i>        | 5ID3  | aq NMR  | (NMR) | closed               | 87  |
| MgtE, <i>T. thermophilus</i>  | 2ZY9  | X-ray   | 2.94  | closed               | 69  |
| MgtE, <i>T. thermophilus</i>  | 4U9N  | X-ray   | 2.2   | closed               | 56  |
| MscL, <i>M. tuberculosis</i>  | 2OAR  | X-ray   | 3.5   | closed               | 46  |
| MscL, <i>S. aureus</i>        | 3HZQ  | X-ray   | 3.82  | closed/intermediate  | 0   |
| MscL, <i>M. acetivorans</i>   | 4Y7J  | X-ray   | 4.1   | closed/intermediate  | 0   |
| MscL, <i>M. acetivorans</i>   | 4Y7K  | X-ray   | 3.5   | closed               | 81  |
| MscS, <i>E. coli</i>          | 2OAU  | X-ray   | 3.7   | open                 | 15  |
| MscS, <i>E. coli</i>          | 2VV5  | X-ray   | 3.45  | open                 | 0   |
| NNT, <i>T. thermophilus</i>   | 5UNI  | X-ray   | 2.2   |                      | 71  |

|                                    |      |         |      |        |     |
|------------------------------------|------|---------|------|--------|-----|
| Orai, <i>D. melanogaster</i>       | 4HKR | X-ray   | 3.35 | closed | 8   |
| Piezo1, <i>M. musculus</i>         | 6BPZ | cryo-EM | 3.8  | closed | 37  |
| TMEM175, <i>C. minutus</i>         | 5VRE | X-ray   | 3.30 |        | 45  |
| TRIC, <i>C. elegans</i>            | 5EGI | X-ray   | 3.3  |        | 7   |
| TRIC, <i>C. elegans</i>            | 5EIK | X-ray   | 2.3  |        | 12  |
| TRIC,<br><i>S. acidocaldarius</i>  | 5WUC | X-ray   | 1.6  | closed | 71  |
| TRIC,<br><i>S. acidocaldarius</i>  | 5WUE | X-ray   | 2.4  | open   | 0   |
| TRIC,<br><i>C. psychrerythraea</i> | 5WUF | X-ray   | 2.40 |        | 2.4 |
| YetJ, <i>B. subtilis</i>           | 4PGR | X-ray   | 1.95 | closed | 29  |
| YetJ, <i>B. subtilis</i>           | 4PGS | X-ray   | 2.5  | open   | 4.3 |
| YetJ, <i>B. subtilis</i>           | 4PGU | X-ray   | 3.40 | closed | 58  |
| <b>Other anion channels</b>        |      |         |      |        |     |
| BEST1, <i>G. gallus</i>            | 4RDQ | X-ray   | 2.85 | open   | 76  |
| KpBest, <i>K. pneumoniae</i>       | 4WD8 | X-ray   | 2.3  | closed | 71  |
| CFTR, <i>H. sapiens</i>            | 5UAK | cryo-EM | 3.87 | closed | 15  |
| CFTR, <i>D. rerio</i>              | 5UAR | cryo-EM | 3.73 | closed | 58  |
| CFTR, <i>D. rerio</i>              | 5W81 | cryo-EM | 3.37 | closed | 38  |
| CLC-K, <i>B. taurus</i>            | 5TQQ | cryo-EM | 3.76 |        | 43  |
| TehA, <i>H. influenzae</i>         | 3M71 | X-ray   | 1.2  | closed | 52  |
| TehA, <i>H. influenzae</i>         | 4YCR | X-ray   | 2.3  |        | 29  |
| TMEM16A,<br><i>M. musculus</i>     | 5OYB | cryo-EM | 3.75 | closed | 9   |
| TMEM16A,<br><i>M. musculus</i>     | 5OYG | cryo-EM | 4.06 | closed | 32  |
| TMEM16A,<br><i>M. musculus</i>     | 6BGI | cryo-EM | 3.8  | closed | 26  |
| TMEM16A,<br><i>M. musculus</i>     | 6BGJ | cryo-EM | 3.8  | closed | 6   |

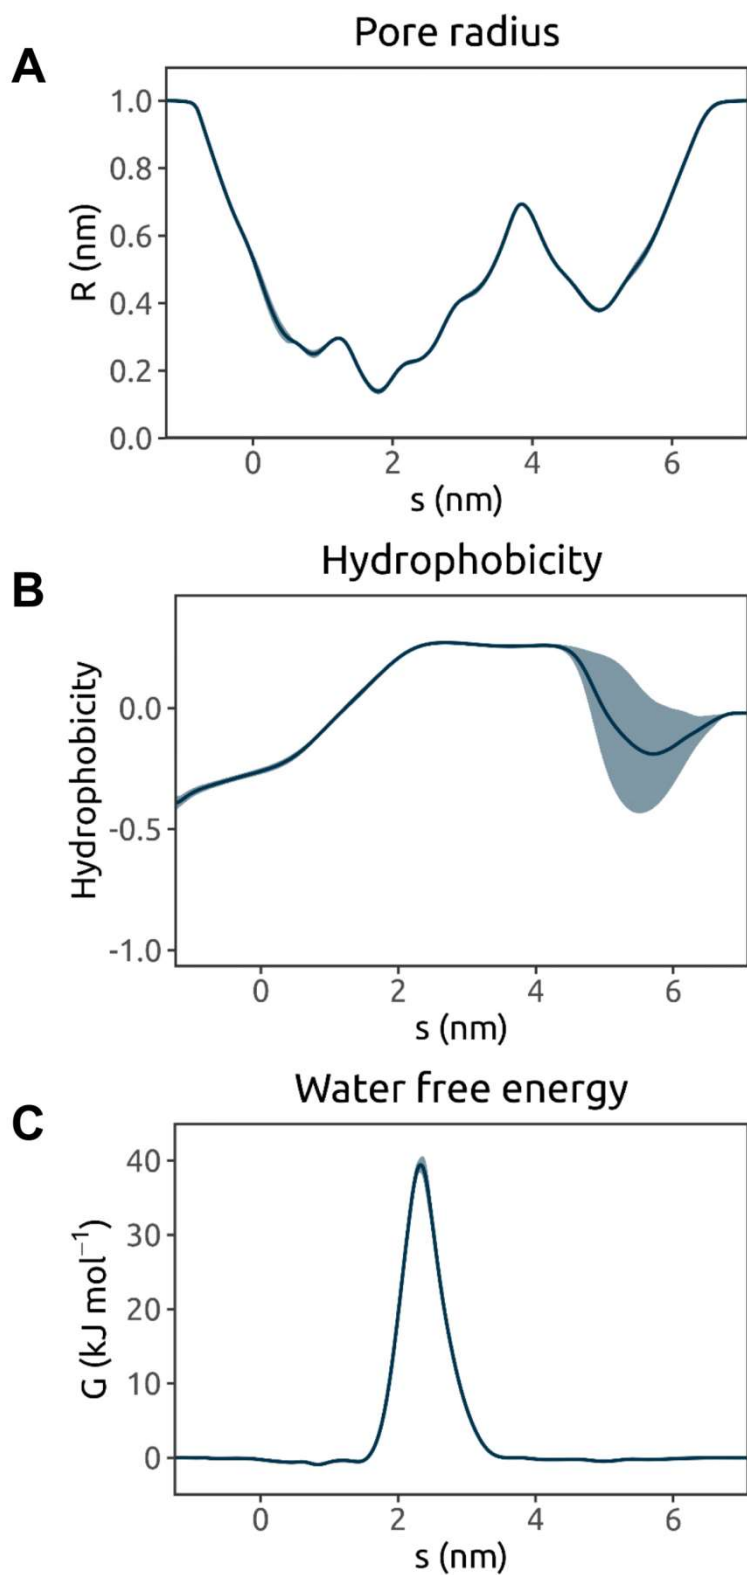

**Figure S1.** Average pore radius, hydrophobicity, and water free energy profiles derived from 3 x 30 ns MD simulations of water in the TRPV4 ion channel (PDB ID 6BBJ). The one-standard-deviation range is represented by the lighter-coloured band.

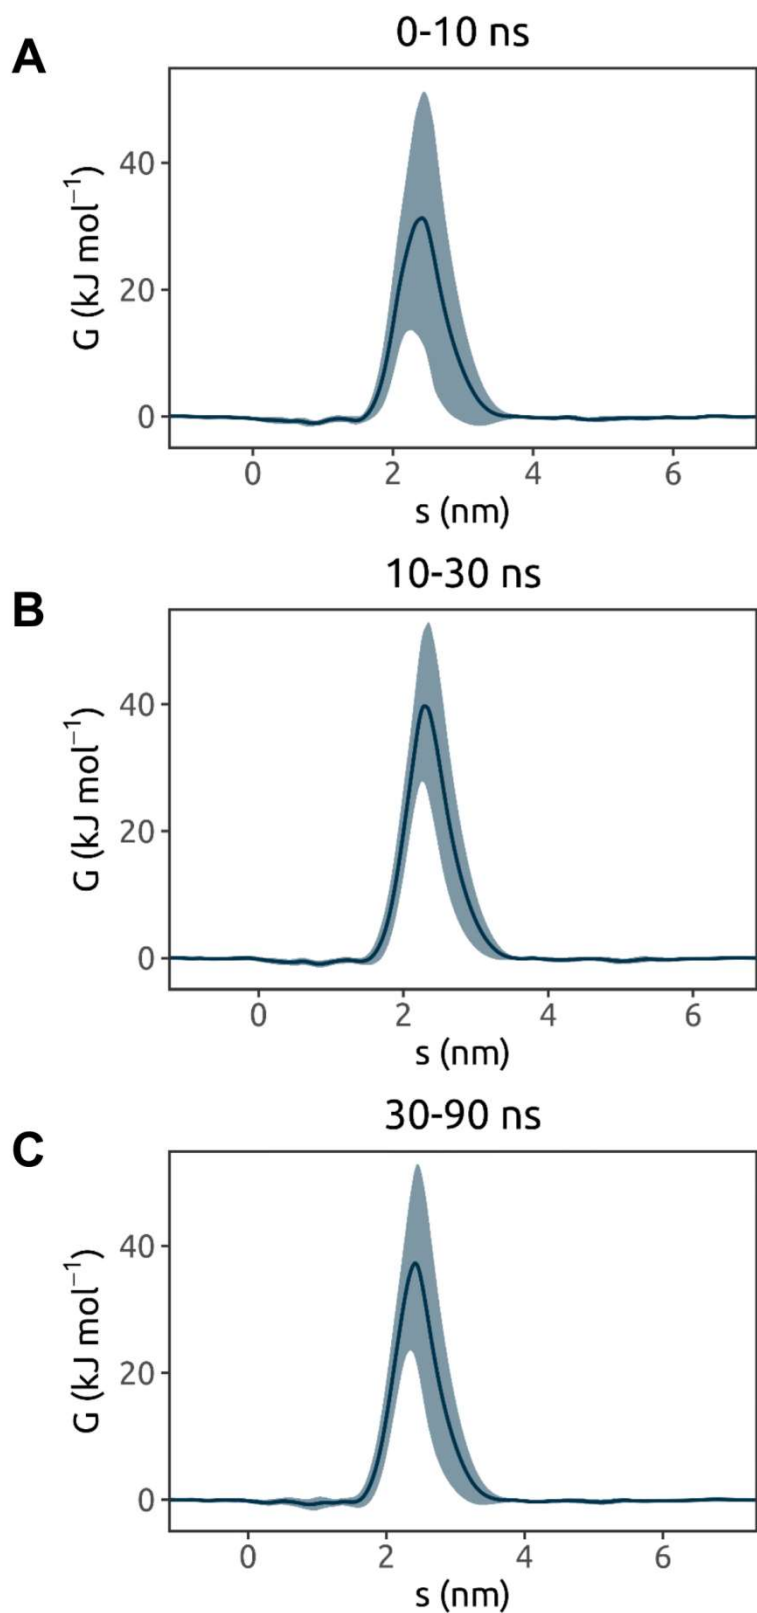

**Figure S2.** Water free energy profiles derived from different intervals of one 90 ns MD simulation of water in the TRPV4 ion channel (PDB ID 6BBJ), sampling every 0.5 ns. The one-standard-deviation range is represented by the lighter-coloured band.



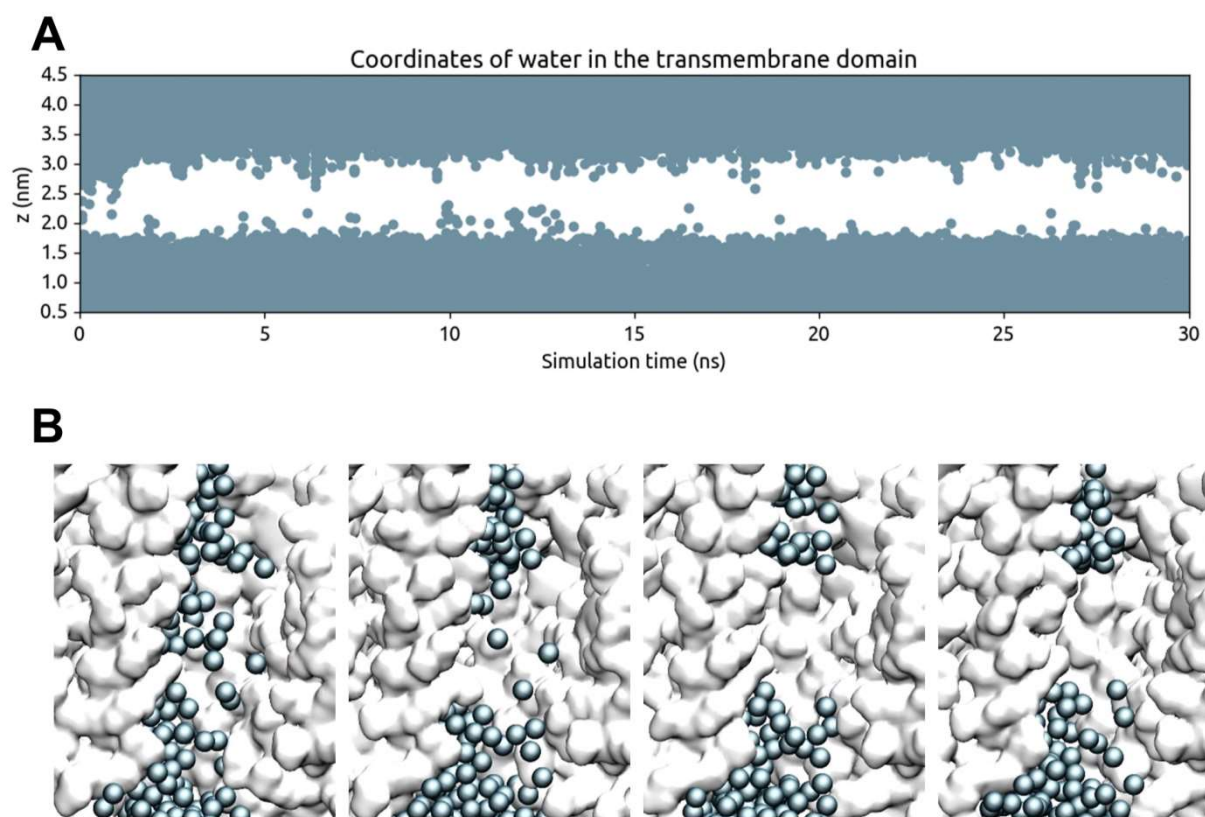

**Figure S3.** De-wetting of the hydrophobic gate region of the TRPV4 ion channel (PDB ID 6BBJ) in a 30 ns MD simulation. Water molecules are shown as blue spheres, with the protein in a surface representation.



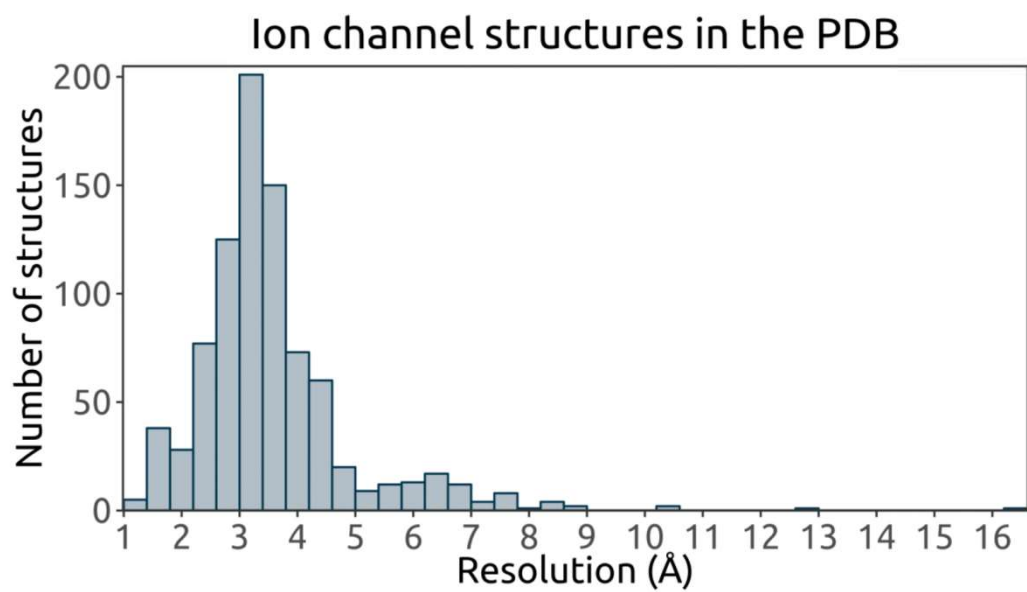

**Figure S4.** Distribution of resolution of ~860 ion channel structures determined by X-ray crystallography or cryo-electron microscopy in the PDB. ~20 NMR structures have been excluded from this analysis.

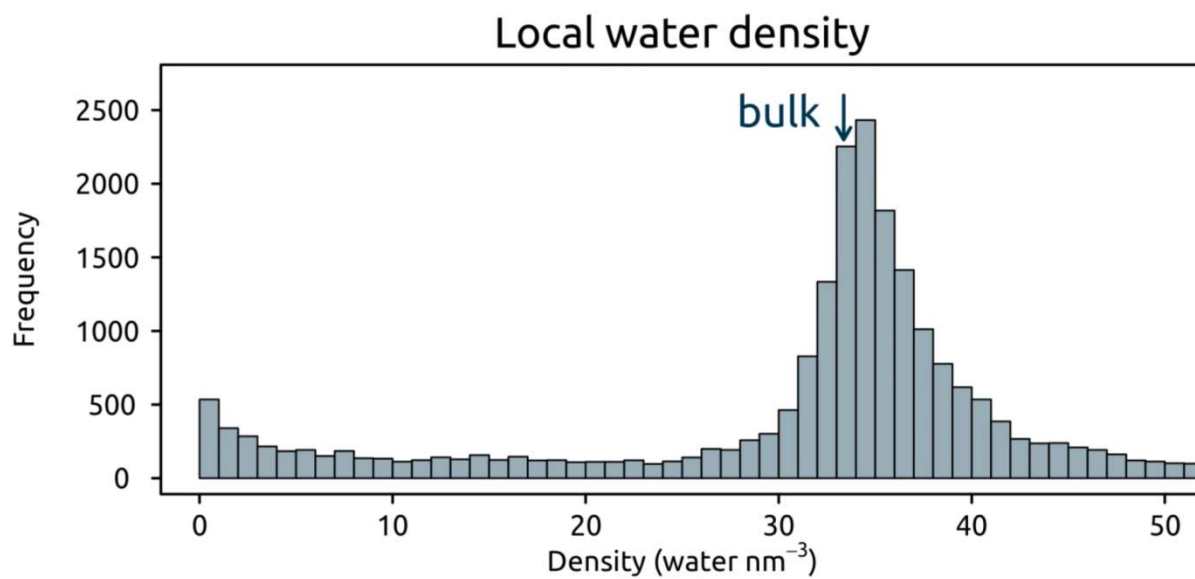

**Figure S5.** Distribution of local water density values for the dataset of all channel simulation, where the arrow indicates the density of bulk liquid water, at 33 water molecules nm<sup>-3</sup>.

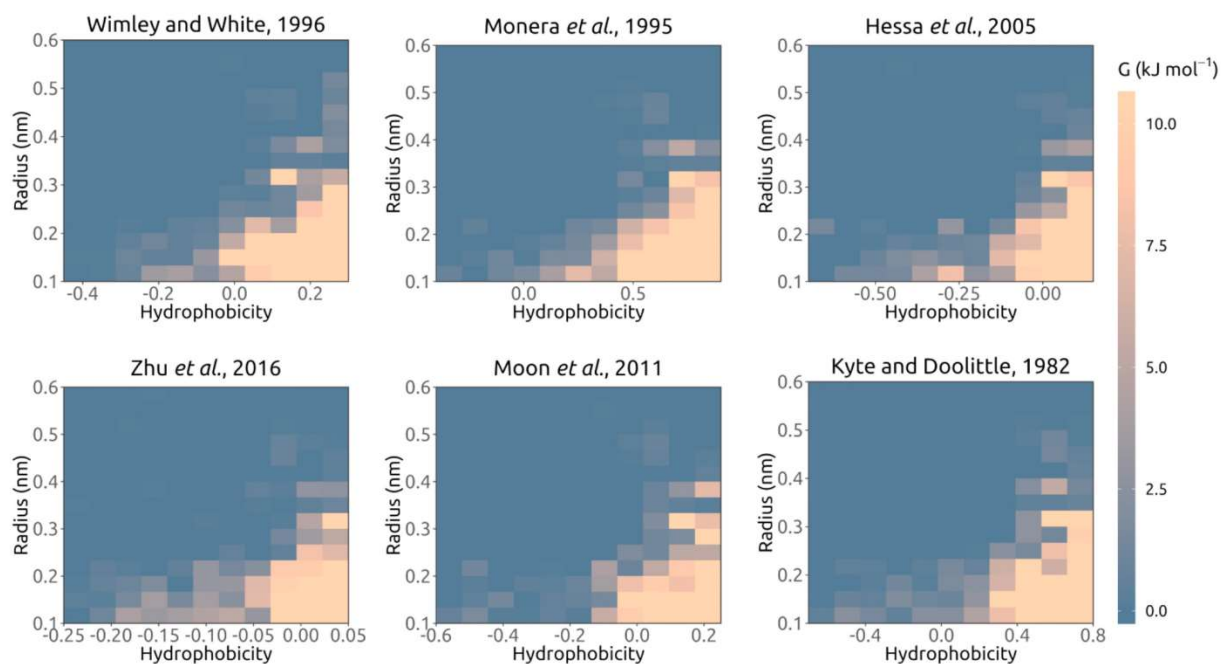

**Figure S6.** Local free energy as a function of hydrophobicity and pore radius, averaged over all occurrences of pore-lining side chains in the simulated channel structures. Alternative hydrophobicity scales are employed, each linearly normalized such that their respective positions of 0 hydrophobicity are unshifted and the largest absolute value amongst amino acids is equal to 1 (relative) unit, with more positive values indicating greater hydrophobicity. The scales compared are from: (1), (2), (3), (4), (5), and (6).

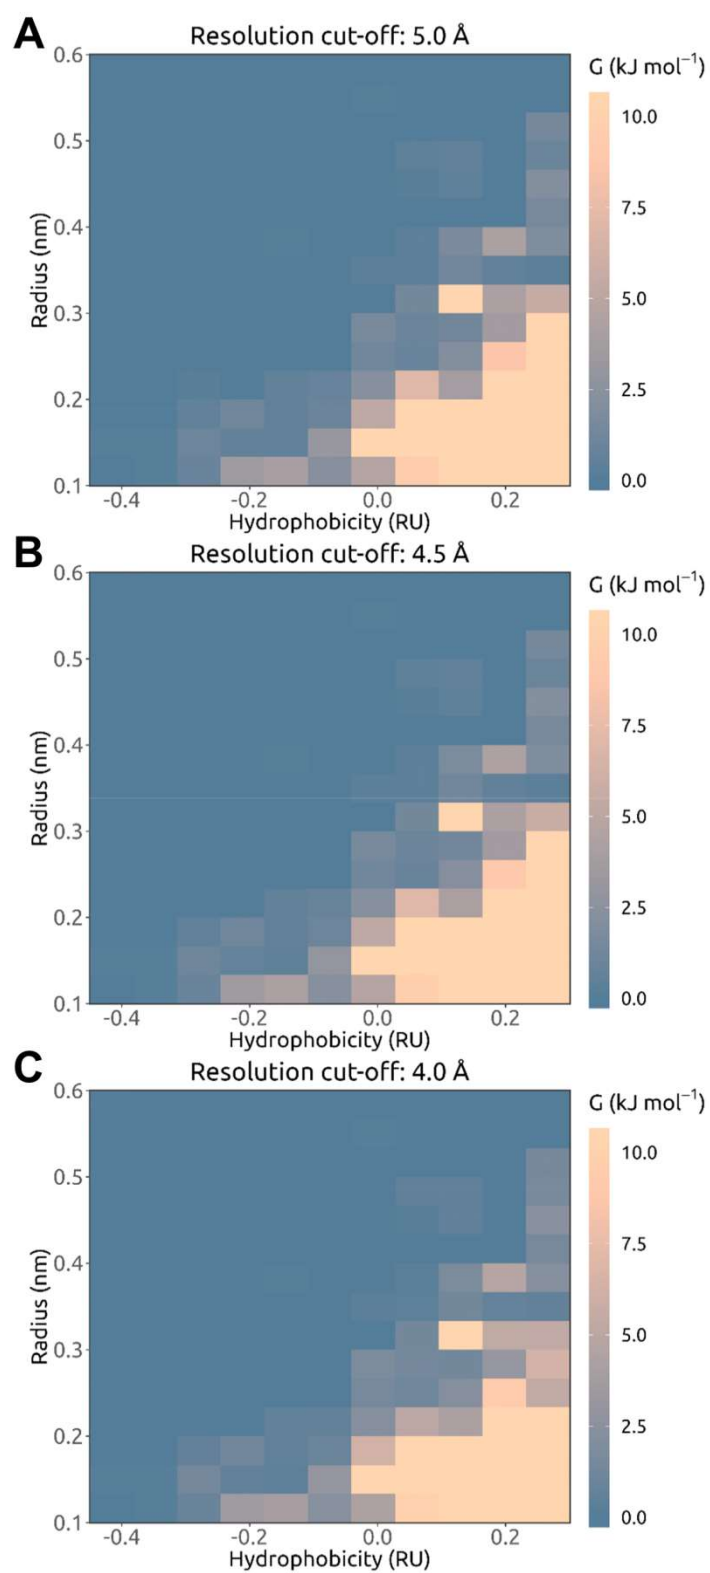

**Figure S7.** Local free energy as a function of hydrophobicity and pore radius, averaged over all occurrences of pore-lining side chains in (A) all simulated channel structures or subsets of simulated structures with resolution better than (B) 4.5 Å or (C) 4.0 Å.

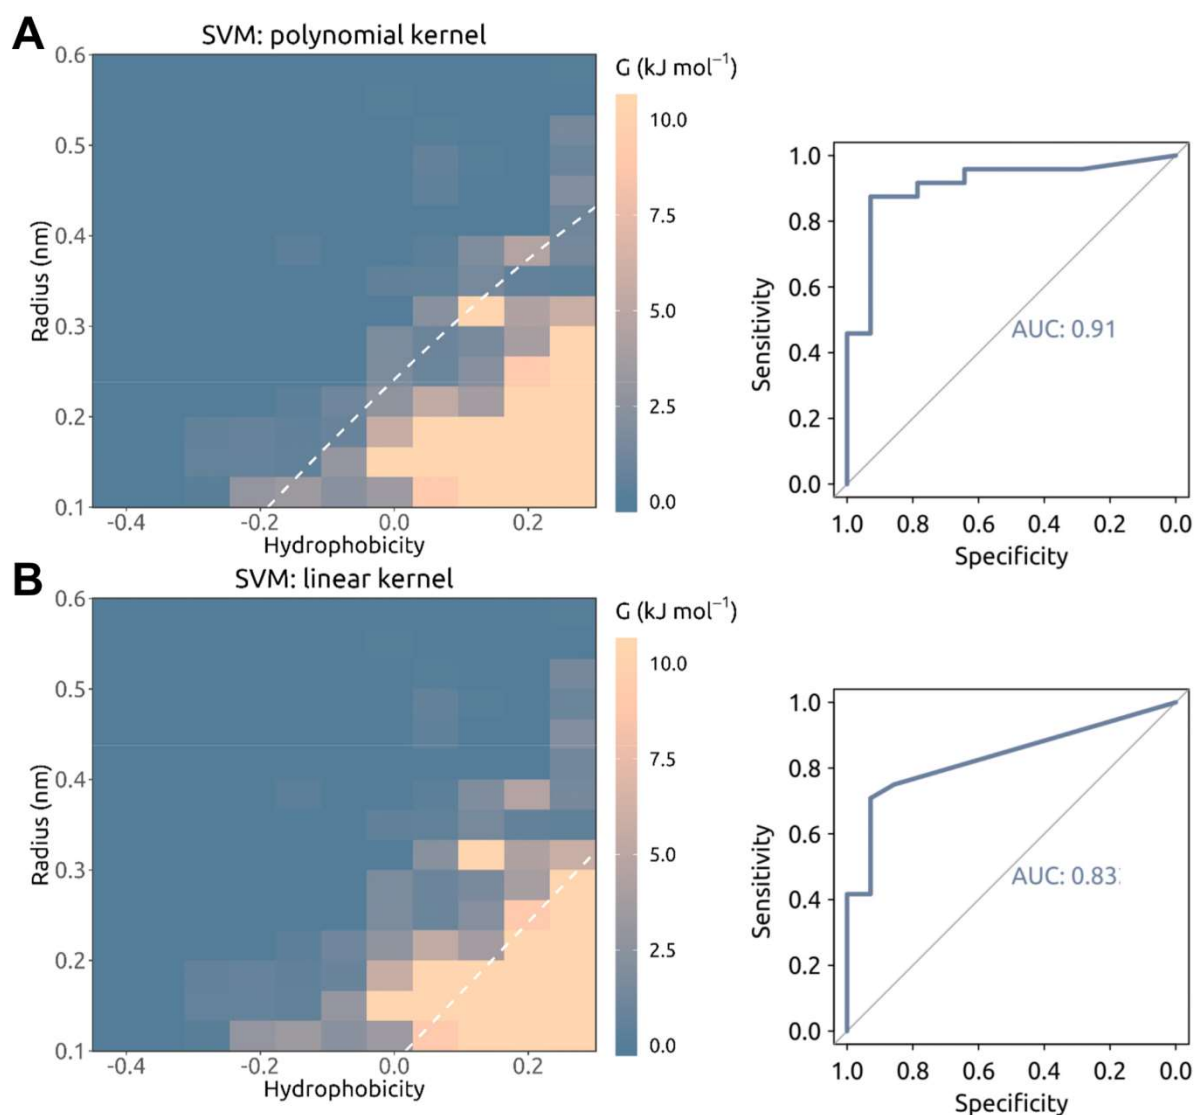

**Figure S8.** SVM classification of all pore-lining residues in a training set of simulated ion channel structures, using (A) a polynomial kernel or (B) a linear kernel. Both SVM models were trained using repeated 10-fold cross-validation. The resultant classification lines were used to predict simulation outcomes for a testing set of ~40 structures via calculation of sum-of-shortest-distances scores, with the respective ROC (receiver operating characteristics) curves shown on the right.

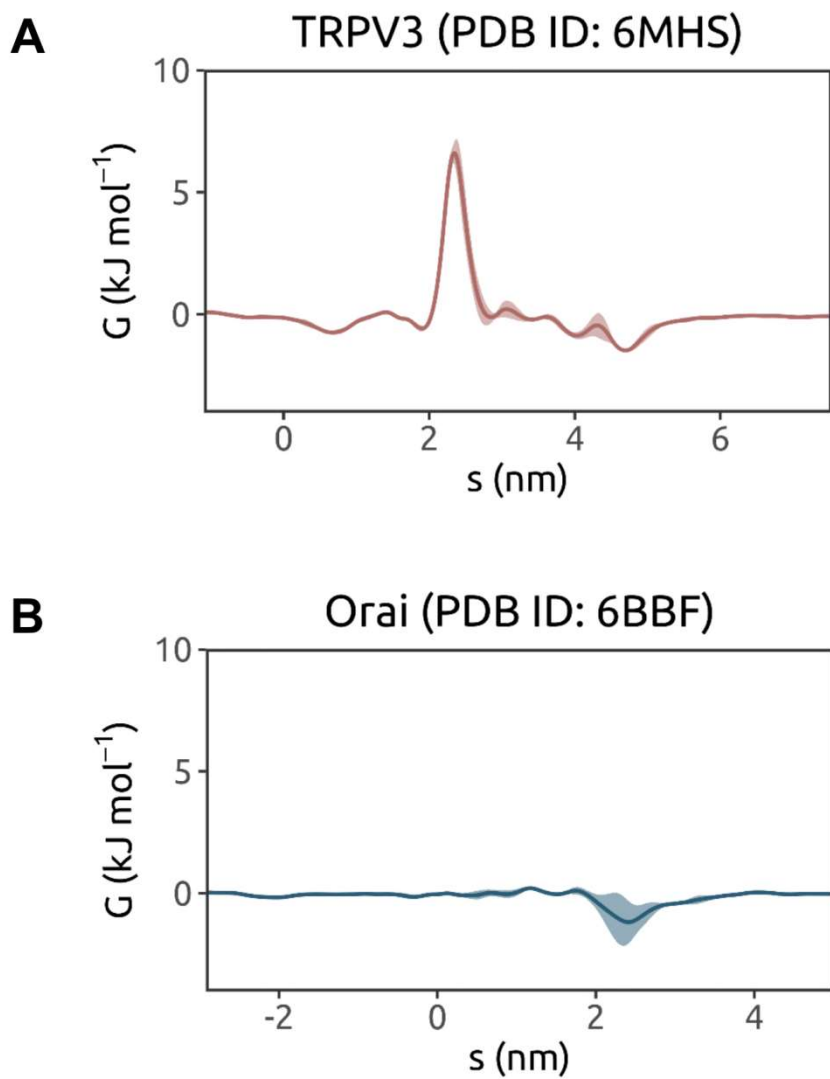

**Figure S9.** Water free energy profiles derived from triplicate 30 ns MD simulations of water of two recent structures of (A) the TRPV3 channel in a non-conductive (sensitized) conformation (PDB ID: 6MHS) and (B) the CRAC channel Orai in an open conformation (due to a H206A gain-of-function mutation; PDB ID: 6BBF).



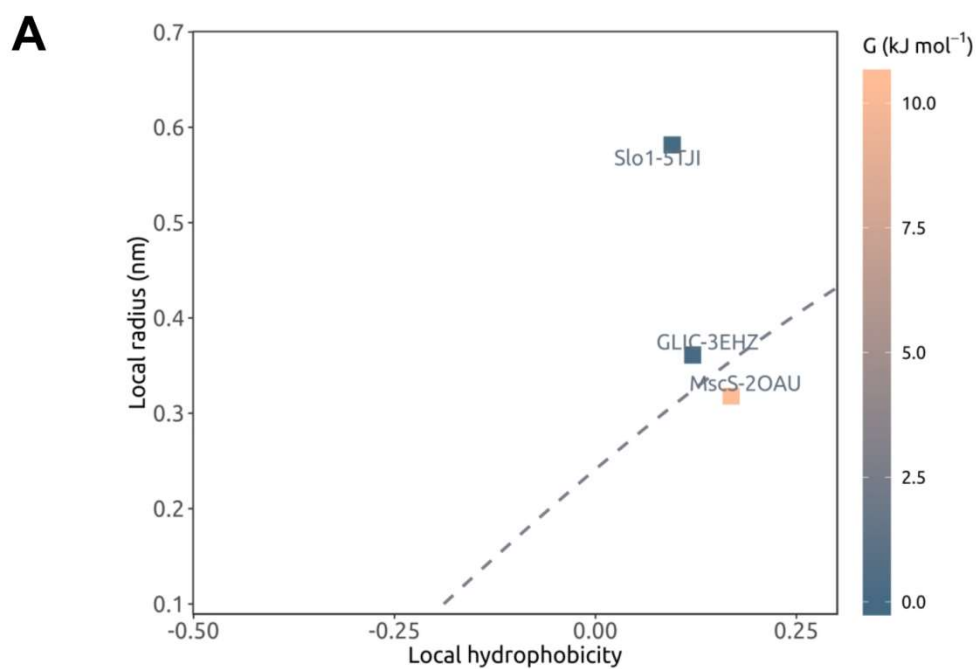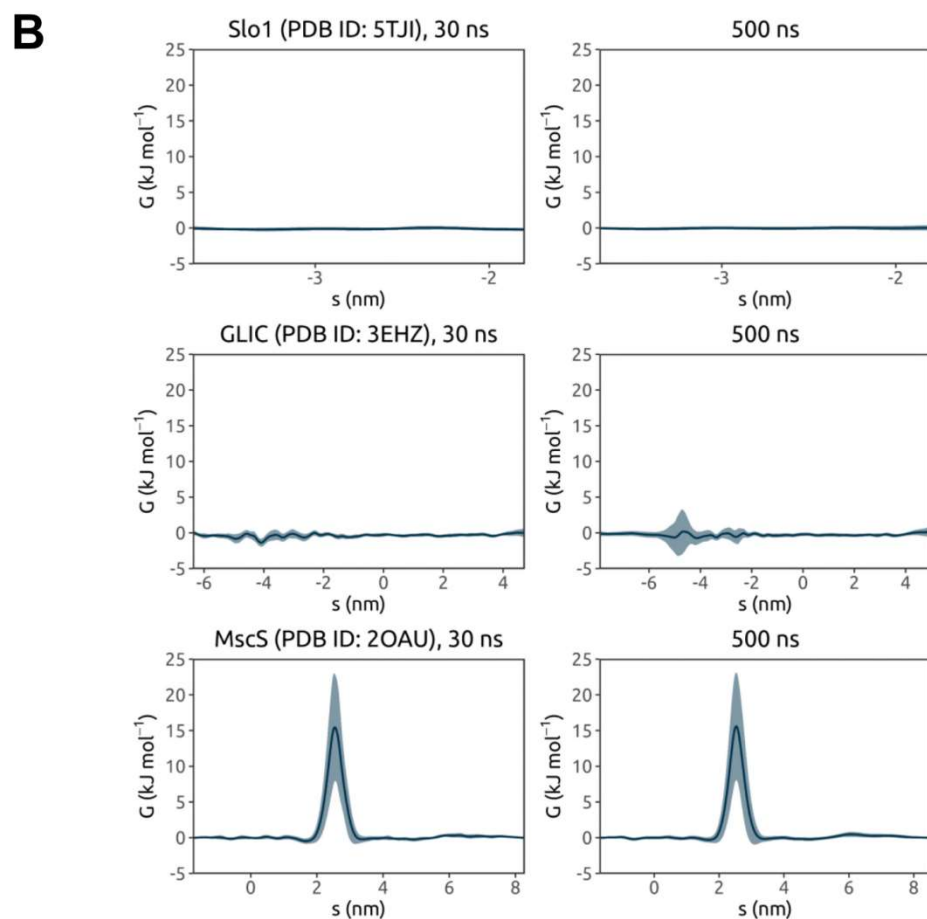

**Figure S10.** (A) Local radius, hydrophobicity, and water free energy at the main energy barrier or putative hydrophobic gate region of three selected ion channel structures, and (B) their water free energy profiles derived from 30 ns and 500 ns MD simulations, during which positional restraints were applied to each protein backbone whilst allowing for side chain flexibility.

## SI References

1. Wimley CW, White SH (1996) Experimentally determined hydrophobicity scale for proteins at membrane interfaces. *Nature Struct Biol* 3:842-848.
2. Monera OD, et al. (1995) Relationship of sidechain hydrophobicity and alpha-helical propensity on the stability of the single-stranded amphipathic alpha-helix *J Pept Sci* 1:319-329.
3. Hessa T, et al. (2005) Recognition of transmembrane helices by the endoplasmic reticulum translocon *Nature* 433:377-381.
4. Zhu CQ, et al. (2016) Characterizing hydrophobicity of amino acid side chains in a protein environment via measuring contact angle of a water nanodroplet on planar peptide network *Proc Natl Acad Sci USA* 113:12946-12951.
5. Moon CP, Fleming KG (2011) Side-chain hydrophobicity scale derived from transmembrane protein folding into lipid bilayers *Proc Natl Acad Sci USA* 108:10174-10177.
6. Kyte J, Doolittle RF (1982) A simple method for displaying the hydrophobic character of a protein. *J Mol Biol* 157:105-132.
